# Supplementary material for: Frequency and distribution of 152 genetic disease variants in over 100,000 mixed breed and purebred dogs
Source: PLoS Genet. 2018 Apr 30;14(4):e1007361. doi: 10.1371/journal.pgen.1007361 (PMC5945203; doi:10.1371/journal.pgen.1007361)
Supplement: S2 Table — (XLS) [file pgen.1007361.s002.xls]

## Sheet: Taul1
S2 Table. Genotyped genetic disease variants.
Tested disease variant	Online Mendelian Inheritance in Animals (OMIA) entry	Mode of inheritance
Alaskan Husky Encephalopathy (AHE)	001097-9615	Autosomal Recessive
Amelogenesis Imperfecta (AI)	001805-9615	Autosomal Recessive
Autosomal Recessive Severe Combined Immunodeficiency (ARSCID)	000220-9615	Autosomal Recessive
Bandera's Neonatal Ataxia (BNAt)	000078-9615	Autosomal Recessive
Benign Familial Juvenile Epilepsy or Remitting Focal Epilepsy (BFJE)	001596-9615	Autosomal Recessive
Bleeding disorder due to P2RY12 defect	001564-9615	Autosomal Recessive
Canine Cyclic Neutropenia (CN)	000248-9615	Autosomal Recessive
Canine Multifocal Retinopathy 2 (CMR2); mutation originally found in Coton de Tulear	001553-9615	Autosomal Recessive
Canine Multifocal Retinopathy 3 (CMR3); mutation originally found in Lapponian Herder	001554-9615	Autosomal Recessive
Cavalier King Charles Spaniel Muscular Dystrophy (CKCS-MD)	001081-9615	X-linked Recessive
Centronuclear Myopathy (CNM); mutation originally found in Great Dane	001660-9615	Autosomal Recessive
Centronuclear Myopathy (CNM); mutation originally found in Labrador Retriever	001374-9615	Autosomal Recessive
Chondrodysplasia; mutation originally found in Norwegian Elkhound and Karelian Bear Dog	001886-9615	Autosomal Recessive
Cleft Palate / Cleft Lip and Palate with Syndactyly; DLX6 gene mutation originally found in Nova Scotia Duck Tolling Retriever	001919-9615	Autosomal Recessive
Collie Eye Anomaly (CEA)	000218-9615	Autosomal Recessive
Complement 3 (C3) Deficiency	000155-9615	Autosomal Recessive
Cone Degeneration (CD) or Achromatopsia	001365-9615	Autosomal Recessive
Cone Degeneration (CD) or Achromatopsia; mutation originally found in German Shorthaired Pointer	001676-9615	Autosomal Recessive
Cone-Rod Dystrophy (cord1-PRA / crd4)	001432-9615	Autosomal Recessive (Incomplete Penetrance)
Cone-Rod Dystrophy 1 (crd1); mutation originally found in American Staffordshire Terrier	001674-9615	Autosomal Recessive
Cone-Rod Dystrophy 2 (crd2); mutation originally found in Pit Bull Terrier	001675-9615	Autosomal Recessive
Cone-Rod Dystrophy of Standard Wirehaired Dachshund (crd SWD)	001455-9615	Autosomal Recessive
Congenital Hypothyroidism; mutation originally found in Toy Fox- and Rat Terrier	000536-9615	Autosomal Recessive
Congenital Keratoconjunctivitis Sicca and Ichthyosiform Dermatosis (CKCSID)	001683-9615	Autosomal Recessive
Congenital Myasthenic Syndrome (CMS); mutation originally found in Old Danish Pointing Dog	000685-9615	Autosomal Recessive
Congenital Stationary Night Blindness (CSNB)	001222-9615	Autosomal Recessive
Craniomandibular Osteopathy (CMO)	000236-9615	Autosomal Dominant (Incomplete Penetrance)
Cystinuria Type I-A; mutation originally found in Newfoundland Dog	000256-9615	Autosomal Recessive
Cystinuria Type II-A; mutation originally found in Australian Cattle Dog	001879-9615	Autosomal Dominant
Cystinuria Type II-B; mutation originally found in Miniature Pinscher	001880-9615	Autosomal Dominant
Degenerative Myelopathy (DM)	000263-9615	Autosomal Recessive (Incomplete Penetrance)
Dominant Progressive Retinal Atrophy (DPRA)	001346-9615	Autosomal Dominant
Duchenne or Dystrophin Muscular Dystrophy (DMD); mutation originally found in Golden Retriever	001081-9615	X-linked Recessive
Early Retinal Degeneration (erd); mutation originally found in Norwegian Elkhound	001297-9615	Autosomal Recessive
Early-Onset Progressive Polyneuropathy; mutation originally found in Alaskan Malamute	001292-9615	Autosomal Recessive
Early-Onset Progressive Polyneuropathy; mutation originally found in Greyhound	001292-9615	Autosomal Recessive
Epidermolysis bullosa dystrophic; mutation originally found in Golden Retriever	000341-9615	Autosomal Recessive
Epidermolytic Hyperkeratosis	001415-9615	Autosomal Recessive
Episodic Falling (EF)	001592-9615	Autosomal Recessive
Exercise-Induced Collapse (EIC)	001466-9615	Autosomal Recessive (Incomplete Penetrance)
Factor IX Deficiency or Hemophilia B; mutation Gly379Glu	000438-9615	X-linked Recessive
Factor IX Deficiency or Hemophilia B; mutation originally found in Airedale Terrier	000438-9615	X-linked Recessive
Factor IX Deficiency or Hemophilia B; mutation originally found in Lhasa Apso	000438-9615	X-linked Recessive
Factor IX Deficiency or Hemophilia B; mutation originally found in Rhodesian Ridgeback	000438-9615	X-linked Recessive
Factor VII Deficiency	000361-9615	Autosomal Recessive
Factor VIII Deficiency or Hemophilia A; mutation originally found in Boxer	000437-9615	X-linked Recessive
Factor VIII Deficiency or Hemophilia A; mutation originally found in German Shepherd Dog	000437-9615	X-linked Recessive
Factor VIII Deficiency or Hemophilia A; p.Cys548Tyr mutation originally found in German Shepherd	000437-9615	X-linked Recessive
Familial Nephropathy (FN); mutation originally found in English Cocker Spaniel	000710-9615	Autosomal Recessive
Familial Nephropathy (FN); mutation originally found in English Springer Spaniel	000710-9615	Autosomal Recessive
Fetal Onset Neuroaxonal Dystrophy (FNAD)	000715-9615	Autosomal Recessive
Generalized Progressive Retinal Atrophy	001521-9615	Autosomal Recessive
Glanzmann Thrombasthenia Type I (GT); mutation originally found in Pyrenean Mountain Dog	001000-9615	Autosomal Recessive
Globoid Cell Leukodystrophy or Krabbe's Disease (GLD); mutation originally found in Irish Setter	000578-9615	Autosomal Recessive
Globoid Cell Leukodystrophy or Krabbe's Disease (GLD); mutation originally found in Terriers	000578-9615	Autosomal Recessive
Glycogen Storage Disease Type Ia (GSD Ia)	000418-9615	Autosomal Recessive
Glycogen Storage Disease Type II or Pompe's Disease (GSD II)	000419-9615	Autosomal Recessive
Glycogen Storage Disease Type IIIa (GSD IIIa)	001577-9615	Autosomal Recessive
GM1 Gangliosidosis; mutation originally found in Alaskan Husky	000402-9615	Autosomal Recessive
GM1 Gangliosidosis; mutation originally found in Portuguese Water Dog	000402-9615	Autosomal Recessive
GM1 Gangliosidosis; mutation originally found in Shiba Dog	000402-9615	Autosomal Recessive
GM2 Gangliosidosis; mutation originally found in Japanese Chin	001461-9615	Autosomal Recessive
GM2 Gangliosidosis; mutation originally found in Toy Poodle	001462-9615	Autosomal Recessive
Golden Retriever Ichthyosis	001588-9615	Autosomal Recessive
Golden Retriever Progressive Retinal Atrophy 1 (GR_PRA 1)	001572-9615	Autosomal Recessive
Golden Retriever Progressive Retinal Atrophy 2 (GR_PRA 2)	001984-9615	Autosomal Recessive
Hereditary Ataxia or Cerebellar Ataxia; mutation originally found in Old English Sheepdog and Gordon Setter	001913-9615	Autosomal Recessive
Hereditary Elliptocytosis	001318-9615	Autosomal
Hereditary Footpad Hyperkeratosis (HFH)	001327-9615	Autosomal Recessive
Hereditary Nasal Parakeratosis (HNPK)	001373-9615	Autosomal Recessive
Hereditary Phosphofructokinase (PFK) Deficiency	000421-9615	Autosomal Recessive
Hereditary Vitamin D-Resistant Rickets (HVDRR)	001431-9615	Autosomal Recessive
Hyperekplexia or Startle Disease	001594-9615	Autosomal Recessive
Hyperuricosuria (HUU)	001033-9615	Autosomal Recessive
Hypocatalasia or Acatalasemia	001138-9615	Autosomal Recessive
Hypomyelination; mutation originally found in Weimaraner	000526-9615	Autosomal Recessive
Imerslund-Gräsbeck Syndrome (IGS); mutation originally found in Beagle	001786-9615	Autosomal Recessive
Imerslund-Gräsbeck Syndrome (IGS); mutation originally found in Border Collie	001786-9615	Autosomal Recessive
L-2-Hydroxyglutaric aciduria (L2HGA); mutation originally found in Staffordshire Bull Terrier	001371-9615	Autosomal Recessive
Lagotto Storage Disease (LSD)	001954-9615	Autosomal Recessive
Lamellar Ichthyosis (LI)	000546-9615	Autosomal Recessive
Macrothrombocytopenia; disease-linked variant originally found in Norfolk and Cairn Terrier	001001-9615	Autosomal Recessive
Malignant Hyperthermia (MH)	000621-9615	Autosomal Dominant
May-Hegglin Anomaly (MHA)	001608-9615	Autosomal Dominant
Mucopolysaccharidosis Type IIIA (MPS IIIA); mutation originally found in Dachshund	001309-9615	Autosomal Recessive
Mucopolysaccharidosis Type IIIA (MPS IIIA); mutation originally found in New Zealand Huntaway	001309-9615	Autosomal Recessive
Mucopolysaccharidosis Type VII (MPS VII); mutation originally found in Brazilian Terrier	000667-9615	Autosomal Recessive
Mucopolysaccharidosis Type VII (MPS VII); mutation originally found in German Shepherd	000667-9615	Autosomal Recessive
Multidrug Resistance 1 (MDR1 gene variant)	001402-9615	Autosomal Recessive
Muscular Hypertrophy (Double Muscling)	000683-9615	Autosomal Recessive
Musladin-Lueke syndrome (MLS)	001509-9615	Autosomal Recessive
Myotonia Congenita; mutation originally found in Australian Cattle Dog	000698-9615	Autosomal Recessive
Myotonia Congenita; mutation originally found in Miniature Schnauzer	000698-9615	Autosomal Recessive
Narcolepsy; mutation originally found in Dachshund	000703-9615	Autosomal Recessive
Narcolepsy; mutation originally found in Doberman Pinscher	000703-9615	Autosomal Recessive
Narcolepsy; mutation originally found in Labrador Retriever	000703-9615	Autosomal Recessive
Neonatal Cerebellar Cortical Degeneration or Cerebellar Abiotrophy (NCCD)	000175-9615	Autosomal Recessive
Neonatal Encephalopathy with Seizures (NEWS)	001471-9615	Autosomal Recessive
Neuronal Ceroid Lipofuscinosis 1 (NCL1); mutation originally found in Dachshund	001504-9615	Autosomal Recessive
Neuronal Ceroid Lipofuscinosis 10 (NCL10); mutation originally found in American Bulldog	001505-9615	Autosomal Recessive
Neuronal Ceroid Lipofuscinosis 4A (NCL4); mutation originally found in American Staffordshire Terrier	001503-9615	Autosomal Recessive
Neuronal Ceroid Lipofuscinosis 5 (NCL5); mutation originally found in Border Collie	001482-9615	Autosomal Recessive
Neuronal Ceroid Lipofuscinosis 8 (NCL8); mutation originally found in Australian Shepherd mix	001506-9615	Autosomal Recessive
Neuronal Ceroid Lipofuscinosis 8 (NCL8); mutation originally found in English Setter	001506-9615	Autosomal Recessive
Oculoskeletal Dysplasia 2 or Dwarfism-Retinal Dysplasia 2 (OSD2)	001523-9615	Autosomal Recessive
Osteochondrodysplasia; mutation originally found in Miniature Poodle	001315-9615	Autosomal Recessive
Osteogenesis Imperfecta (OI); mutation originally found in Dachshund	001483-9615	Autosomal Recessive
Persistent Müllerian Duct Syndrome (PMDS); mutation originally found in Miniature Schnauzer	000791-9615	Autosomal Recessive
Polycystic Kidney Disease in Bull Terriers (BTPKD)	000807-9615	Autosomal Dominant
Prekallikrein Deficiency	000819-9615	Autosomal Recessive
Primary Ciliary Dyskinesia (PCD)	001540-9615	Autosomal Recessive
Primary Hereditary Cataract (PHC); mutation originally found in Australian Shepherd	001758-9615	Autosomal Dominant (Incomplete Penetrance)
Primary Hereditary Cataract (PHC); mutation originally found in Terriers	001758-9615	Autosomal Recessive
Primary Lens Luxation (PLL)	000588-9615	Autosomal Recessive
Primary Open Angle Glaucoma (POAG); mutation originally found in Beagle	001870-9615	Autosomal Recessive
Primary Open Angle Glaucoma (POAG); mutation originally found in Norwegian Elkhound	001870-9615	Autosomal Recessive
Progressive Retinal Atrophy (PAP1_PRA); mutation originally found in Papillon and Phalene	000830-9615	Autosomal Recessive
Progressive Retinal Atrophy (PRA); mutation originally found in Basenji	001876-9615	Autosomal Recessive
Progressive Retinal Atrophy Type III (PRA type III); mutation originally found in Tibetan Spaniel and Tibetan Terrier	001918-9615	Autosomal Recessive
Progressive Rod-Cone Degeneration (PRCD)	001298-9615	Autosomal Recessive
Protein Losing Nephropathy (PLN); NPHS1 gene variant	001326-9615	Autosomal
Pyruvate Dehydrogenase Phosphatase 1 (PDP1) Deficiency	001406-9615	Autosomal Recessive
Pyruvate Kinase Deficiency; mutation originally found in Basenji	000844-9615	Autosomal Recessive
Pyruvate Kinase Deficiency; mutation originally found in Beagle	000844-9615	Autosomal Recessive
Pyruvate Kinase Deficiency; mutation originally found in Pug	000844-9615	Autosomal Recessive
Pyruvate Kinase Deficiency; mutation originally found in West Highland White Terrier	000844-9615	Autosomal Recessive
Renal Cystadenocarcinoma and Nodular Dermatofibrosis (RCND)	001335-9615	Autosomal Dominant
Rod-Cone Dysplasia 1 (rcd1); mutation originally found in Irish Setter	000882-9615	Autosomal Recessive
Rod-Cone Dysplasia 1a (rdc1a); mutation originally found in Sloughi	001669-9615	Autosomal Recessive
Rod-Cone Dysplasia 3 (rcd3)	001314-9615	Autosomal Recessive
Severe Combined Immunodeficiency in Frisian Water Dogs (SCID)	001574-9615	Autosomal Recessive
Skeletal Dysplasia 2 (SD2)	001772-9615	Autosomal Recessive
Spinal Dysraphism	000938-9615	Autosomal Recessive
Spinocerebellar Ataxia / Late-Onset Ataxia (SCA/LOA)	001820-9615	Autosomal Recessive
Spinocerebellar Ataxia with Myokymia and/or Seizures (SCA)	001820-9615	Autosomal Recessive
Thrombopathia; mutation originally found in Basset Hound	001003-9615	Autosomal Recessive
Thrombopathia; mutation originally found in Eskimo Spitz	001003-9615	Autosomal Recessive
Thrombopathia; mutation originally found in Landseer	001003-9615	Autosomal Recessive
Trapped Neutrophil Syndrome (TNS)	001428-9615	Autosomal Recessive
Von Willebrand's Disease Type 1 (vWD 1)	001057-9615	Autosomal Recessive
Von Willebrand's Disease Type 2 (vWD 2)	001339-9615	Autosomal Recessive
Von Willebrand's Disease Type 3 (vWD 3); mutation originally found in Kooikerhondje	001058-9615	Autosomal Recessive
Von Willebrand's Disease Type 3 (vWD 3); mutation originally found in Scottish Terrier	001058-9615	Autosomal Recessive
Von Willebrand's Disease Type 3 (vWD 3); mutation originally found in Shetland Sheepdog	001058-9615	Autosomal Recessive
X-Linked Ectodermal Dysplasia (XHED)	000543-9615	X-linked Recessive
X-Linked Hereditary Nephropathy (XLHN)	001112-9615	X-linked Recessive
X-Linked Myotubular Myopathy	001508-9615	X-linked Recessive
X-Linked Progressive Retinal Atrophy 1 (XLPRA1)	000831-9615	X-linked Recessive
X-Linked Progressive Retinal Atrophy 2 (XLPRA2)	001518-9615	X-linked Recessive
X-linked Severe Combined Immunodeficiency (XSCID); mutation originally found in Basset Hound	000899-9615	X-linked Recessive
X-linked Severe Combined Immunodeficiency (XSCID); mutation originally found in Cardigan Welsh Corgi	000899-9615	X-linked Recessive
X-Linked Tremors; mutation originally found in English Springer Spaniel	000770-9615	X-linked Recessive
